# Supplementary material for: Effect of synthesis process on the Li-ion conductivity of LiTa2PO8 solid electrolyte materials for all-solid-state batteries
Source: Royal Society of Chemistry journal article supplement (doi:10.1039/d4ya00180j), 2024-01-01
Supplement: d4ya00180j1.pdf [file d4ya00180j1.pdf]

## Electronic Supplementary Information

### **Effect of synthesis process on the Li-ion conductivity of $\text{LiTa}_2\text{PO}_8$ solid electrolyte materials for all-solid-state batteries**

Hayami Takeda,<sup>\*a</sup> Miki Shibasaki,<sup>a</sup> Kento Murakami,<sup>a</sup> Miki Tanaka,<sup>a</sup> Keisuke Makino,<sup>a</sup> Naoto Tanibata,<sup>a</sup> Hirotaka Maeda,<sup>a</sup> and Masanobu Nakayama<sup>\*a</sup>

<sup>a</sup>Department of Advanced Ceramics, Nagoya Institute of Technology, Gokiso, Showa, Nagoya, Aichi 466-8555, Japan

Table S1. Identified crystals in samples A and D after heating for 30 min at 750, 850, 950, 1050, and 1100 °C.

| Heating temperature / ° C | Sample A             | Sample D             |
|---------------------------|----------------------|----------------------|
| 750                       | Ta2O5, TaPO5         | Ta2O5, TaPO5         |
| 850                       | Ta2O5, TaPO5         | Ta2O5, TaPO5         |
| 950                       | Ta2O5, PrecursorLTPO | Ta2O5, PrecursorLTPO |
| 1050                      | PrecursorLTPO, LTPO  | PrecursorLTPO        |
| 1100                      | LTPO, PrecursorLTPO  | PrecursorLTPO, LTPO  |

Table S2-1. Structural information of the samples determined via Rietveld analysis of the X-ray powder diffraction data.

|                                           | sample A   | sample B   | sample C   | sample D   |
|-------------------------------------------|------------|------------|------------|------------|
| $R_{wp}$                                  | 6.148      | 5.683      | 6.325      | 7.013      |
| $R_p$                                     | 4.484      | 4.155      | 4.66       | 5.146      |
| mass ratio of $\text{LiTa}_2\text{PO}_8$  | 0.9805     | 0.9671     | 0.9792     | 0.978      |
| mass ratio of $\text{LiTa}_3\text{O}_8$   | 0.0195     | 0.0329     | 0.0208     | 0.022      |
| Lattice parameters:                       |            |            |            |            |
| LiTa <sub>2</sub> PO <sub>8</sub> in C2/C |            |            |            |            |
| a /Å                                      | 9.7067(1)  | 9.7152(1)  | 9.7089(1)  | 9.7039(2)  |
| b /Å                                      | 11.5295(2) | 11.5379(1) | 11.5311(2) | 11.5252(2) |
| c /Å                                      | 10.700(2)  | 10.7078(1) | 10.702(2)  | 10.6977(2) |
| $\alpha$ /°                               | 90         | 90         | 90         | 90         |
| $\beta$ /°                                | 90.05      | 90.05      | 90.0499    | 90.0499    |
| $\gamma$ /°                               | 90         | 90         | 90         | 90         |
| unit -cell volume/Å <sup>3</sup>          | 1197.45(3) | 1200.28(2) | 1198.11(3) | 1196.43(4) |
| LiTa <sub>3</sub> O <sub>8</sub> in C2/C  |            |            |            |            |
| a /Å                                      | 9.417(3)   | 9.419(1)   | 9.410(2)   | 9.404(2)   |
| b /Å                                      | 11.508(4)  | 11.524(2)  | 11.516(2)  | 11.498(3)  |
| c /Å                                      | 5.045(2)   | 5.0502(9)  | 5.046(1)2  | 5.042(2)   |
| $\alpha$ /°                               | 90         | 90         | 90         | 90         |
| $\beta$ /°                                | 91.0493    | 91.0506    | 91.0486    | 91.047     |
| $\gamma$ /°                               | 90         | 90         | 90         | 90         |
| unit -cell volume/Å <sup>3</sup>          | 546.7(3)   | 548.1(1)   | 546.8(2)   | 545.1(3)   |

Table S2-2. Atomic parameters for sample A.

| LiTa <sub>2</sub> PO <sub>8</sub> in C2/C |      |                |          |         |         |                  | LiTa <sub>3</sub> O <sub>8</sub> in C2/C |      |                |          |          |          |                  |
|-------------------------------------------|------|----------------|----------|---------|---------|------------------|------------------------------------------|------|----------------|----------|----------|----------|------------------|
| label/atm                                 | site | site occupancy | x        | y       | z       | B/Å <sup>2</sup> | label/atm                                | Site | site occupancy | x        | y        | z        | B/Å <sup>2</sup> |
| Li1                                       | 8f   | 0.72           | 0.26078  | 0.14395 | 0.40256 | 1                | Ta1                                      | 8f   | 1              | 0.25001  | 0.43998  | 0.25033  | -                |
| Li2                                       | 8f   | 0.21           | -0.08379 | 0.14159 | 0.08445 | 1                | Ta2                                      | 4e   | 1              | 0        | 0.16097  | 0.25     | -                |
| Li3                                       | 4a   | 0.14           | 0        | 0       | 0       | 1                | O1                                       | 8f   | 1              | 0.36966  | -0.06268 | 0.3546   | 1                |
| Ta1                                       | 8f   | 1              | 0.24771  | 0.40352 | 0.24419 | 0.443            | O2                                       | 8f   | 1              | -0.07425 | 0.23323  | 0.52044  | 1                |
| Ta2                                       | 4e   | 1              | 0        | 0.15299 | 0.25    | 0.769            | O3                                       | 8f   | 1              | 0.14244  | 0.0621   | -0.04378 | 1                |
| Ta3                                       | 4b   | 1              | 0        | 0.5     | 0       | 0.385            | O4                                       | 8f   | 1              | 0.0828   | 0.34071  | 0.23175  | 1                |
| P1                                        | 8f   | 1              | 0.50953  | 0.29176 | 0.05905 | 0.497            | Li1                                      | 4e   | 1              | 0        | 0.62(7)  | 0.25     | 1                |
| O1                                        | 8f   | 1              | 0.04744  | 0.15965 | 0.44828 | 1                |                                          |      |                |          |          |          |                  |
| O2                                        | 8f   | 1              | 0.3815   | 0.34798 | 0.0855  | 1                |                                          |      |                |          |          |          |                  |
| O3                                        | 8f   | 1              | 0.35871  | 0.00324 | 0.37803 | 1                |                                          |      |                |          |          |          |                  |

|    |    |   |         |         |         |   |
|----|----|---|---------|---------|---------|---|
| O4 | 8f | 1 | 0.45627 | 0.17584 | 0.06131 | 1 |
| O5 | 8f | 1 | 0.15714 | 0.26425 | 0.20111 | 1 |
| O6 | 8f | 1 | 0.15138 | 0.44397 | 0.39099 | 1 |
| O7 | 8f | 1 | 0.39305 | 0.29161 | 0.35666 | 1 |
| O8 | 8f | 1 | 0.12921 | 0.03025 | 0.21319 | 1 |

Table S2-3. Atomic parameters for sample B.

| LiTa <sub>2</sub> PO <sub>8</sub> in C2/C |      |                |          |         |         |                  | LiTa <sub>3</sub> O <sub>8</sub> in C2/C |      |                |         |          |          |                  |
|-------------------------------------------|------|----------------|----------|---------|---------|------------------|------------------------------------------|------|----------------|---------|----------|----------|------------------|
| label/atm                                 | site | site occupancy | x        | y       | z       | B/Å <sup>2</sup> | label/atm                                | Site | site occupancy | x       | y        | z        | B/Å <sup>2</sup> |
| Li1                                       | 8f   | 0.72           | 0.30083  | 0.14342 | 0.32849 | 1                | Ta1                                      | 8f   | 1              | 0.25026 | 0.43855  | 0.24983  | -                |
| Li2                                       | 8f   | 0.21           | -0.08242 | 0.14241 | 0.08198 | 1                | Ta2                                      | 4e   | 1              | 0       | 0.15961  | 0.25     | -                |
| Li3                                       | 4a   | 0.14           | 0        | 0       | 0       | 1                | O1                                       | 8f   | 1              | 0.38217 | -0.30265 | 0.43925  | 1                |
| Ta1                                       | 8f   | 1              | 0.24747  | 0.40352 | 0.24446 | 0.41             | O2                                       | 8f   | 1              | 0.00063 | 0.17594  | 0.58927  | 1                |
| Ta2                                       | 4e   | 1              | 0        | 0.15303 | 0.25    | 0.892            | O3                                       | 8f   | 1              | 0.13885 | 0.0403   | -0.00734 | 1                |
| Ta3                                       | 4b   | 1              | 0        | 0.5     | 0       | 0.388            | O4                                       | 8f   | 1              | 0.11901 | 0.36786  | 0.20252  | 1                |
| P1                                        | 8f   | 1              | 0.50804  | 0.29073 | 0.05823 | 0.424            | Li1                                      | 4e   | 1              | 0       | 0.62 (4) | 0.25     | 1                |
| O1                                        | 8f   | 1              | 0.04366  | 0.16042 | 0.44506 | 1                |                                          |      |                |         |          |          |                  |
| O2                                        | 8f   | 1              | 0.37827  | 0.35199 | 0.08547 | 1                |                                          |      |                |         |          |          |                  |
| O3                                        | 8f   | 1              | 0.36505  | 0.00529 | 0.37814 | 1                |                                          |      |                |         |          |          |                  |
| O4                                        | 8f   | 1              | 0.4532   | 0.17601 | 0.06024 | 1                |                                          |      |                |         |          |          |                  |
| O5                                        | 8f   | 1              | 0.15957  | 0.26793 | 0.19287 | 1                |                                          |      |                |         |          |          |                  |
| O6                                        | 8f   | 1              | 0.15253  | 0.44418 | 0.3913  | 1                |                                          |      |                |         |          |          |                  |
| O7                                        | 8f   | 1              | 0.39413  | 0.29198 | 0.35607 | 1                |                                          |      |                |         |          |          |                  |
| O8                                        | 8f   | 1              | 0.13129  | 0.0276  | 0.21544 | 1                |                                          |      |                |         |          |          |                  |

Table S2-4. Atomic parameters for sample C.

| LiTa <sub>2</sub> PO <sub>8</sub> in C2/C |      |                |         |         |         |                  | LiTa <sub>3</sub> O <sub>8</sub> in C2/C |      |                |          |          |          |                  |
|-------------------------------------------|------|----------------|---------|---------|---------|------------------|------------------------------------------|------|----------------|----------|----------|----------|------------------|
| label/atm                                 | site | site occupancy | x       | y       | z       | B/Å <sup>2</sup> | label/atm                                | Site | site occupancy | x        | y        | z        | B/Å <sup>2</sup> |
| Li1                                       | 8f   | 0.72           | 0.29295 | 0.14556 | 0.3507  | 1                | Ta1                                      | 8f   | 8              | 0.2502   | 0.43971  | 0.22956  | -                |
| Li2                                       | 8f   | 0.21           | 0.06658 | 0.14424 | 0.08256 | 1                | Ta2                                      | 4e   | 8              | 0        | 0.15974  | 0.25     | -                |
| Li3                                       | 4a   | 0.14           | 0.06658 | 0.14424 | 0.08256 | 1                | O1                                       | 8f   | 8              | 0.36445  | -0.26571 | 0.4895   | 1                |
| Ta1                                       | 8f   | 1              | 0.24772 | 0.40353 | 0.24372 | 0.421            | O2                                       | 8f   | 8              | -0.06397 | 0.30575  | 0.64236  | 1                |
| Ta2                                       | 4e   | 1              | 0       | 0.15309 | 0.25    | 0.898            | O3                                       | 8f   | 8              | 0.14513  | 0.04802  | 0.09913  | 1                |
| Ta3                                       | 4b   | 1              | 0       | 0.5     | 0       | 0.47             | O4                                       | 8f   | 8              | 0.07564  | 0.3218   | -0.33305 | 1                |
| P1                                        | 8f   | 1              | 0.50779 | 0.29185 | 0.05716 | 0.599            | Li1                                      | 4e   | 8              | 0        | 0.62 (6) | 0.25     | 1                |
| O1                                        | 8f   | 1              | 0.0415  | 0.15921 | 0.44516 | 1                |                                          |      |                |          |          |          |                  |
| O2                                        | 8f   | 1              | 0.37917 | 0.35119 | 0.08407 | 1                |                                          |      |                |          |          |          |                  |
| O3                                        | 8f   | 1              | 0.36525 | 0.00824 | 0.37729 | 1                |                                          |      |                |          |          |          |                  |
| O4                                        | 8f   | 1              | 0.45387 | 0.17879 | 0.06195 | 1                |                                          |      |                |          |          |          |                  |
| O5                                        | 8f   | 1              | 0.16    | 0.26684 | 0.19207 | 1                |                                          |      |                |          |          |          |                  |
| O6                                        | 8f   | 1              | 0.15498 | 0.44302 | 0.39142 | 1                |                                          |      |                |          |          |          |                  |
| O7                                        | 8f   | 1              | 0.39579 | 0.29138 | 0.35751 | 1                |                                          |      |                |          |          |          |                  |
| O8                                        | 8f   | 1              | 0.12942 | 0.02605 | 0.21407 | 1                |                                          |      |                |          |          |          |                  |

Table S2-5. Atomic parameters for sample D.

| LiTa <sub>2</sub> PO <sub>8</sub> in C2/C |      |                |         |         |         |                  | LiTa <sub>3</sub> O <sub>8</sub> in C2/C |      |                |          |          |         |                  |
|-------------------------------------------|------|----------------|---------|---------|---------|------------------|------------------------------------------|------|----------------|----------|----------|---------|------------------|
| label/atm                                 | site | site occupancy | x       | y       | z       | B/Å <sup>2</sup> | label/atm                                | Site | site occupancy | x        | y        | z       | B/Å <sup>2</sup> |
| Li1                                       | 8f   | 0.72           | 0.09105 | 0.13784 | 0.41975 | 1                | Ta1                                      | 8f   | 1              | 0.25014  | 0.43596  | 0.20715 | -                |
| Li2                                       | 8f   | 0.21           | 0.08705 | 0.13901 | 0.08453 | 1                | Ta2                                      | 4e   | 1              | 0        | 0.16229  | 0.25    | -                |
| Li3                                       | 4a   | 0.14           | 0       | 0       | 0       | 1                | O1                                       | 8f   | 1              | 0.36042  | -0.08405 | 0.30657 | 1                |
| Ta1                                       | 8f   | 1              | 0.24775 | 0.40358 | 0.24319 | 0.42             | O2                                       | 8f   | 1              | -0.08927 | 0.28952  | 0.62075 | 1                |
| Ta2                                       | 4e   | 1              | 0       | 0.15301 | 0.25    | 0.838            | O3                                       | 8f   | 1              | 0.14098  | 0.07238  | 0.06068 | 1                |
| Ta3                                       | 4b   | 1              | 0       | 0.5     | 0       | 0.422            | O4                                       | 8f   | 1              | 0.07822  | 0.33123  | 0.21726 | 1                |
| P1                                        | 8f   | 1              | 0.50771 | 0.29308 | 0.05796 | 0.402            | Li1                                      | 4e   | 1              | 0        | 0.62 (7) | 0.25    | 1                |
| O1                                        | 8f   | 1              | 0.03987 | 0.15845 | 0.44348 | 1                |                                          |      |                |          |          |         |                  |
| O2                                        | 8f   | 1              | 0.37914 | 0.35084 | 0.08532 | 1                |                                          |      |                |          |          |         |                  |
| O3                                        | 8f   | 1              | 0.36592 | 0.00393 | 0.37673 | 1                |                                          |      |                |          |          |         |                  |
| O4                                        | 8f   | 1              | 0.45569 | 0.1776  | 0.06235 | 1                |                                          |      |                |          |          |         |                  |
| O5                                        | 8f   | 1              | 0.16005 | 0.26872 | 0.19835 | 1                |                                          |      |                |          |          |         |                  |
| O6                                        | 8f   | 1              | 0.15561 | 0.44413 | 0.39302 | 1                |                                          |      |                |          |          |         |                  |
| O7                                        | 8f   | 1              | 0.39568 | 0.29282 | 0.35685 | 1                |                                          |      |                |          |          |         |                  |
| O8                                        | 8f   | 1              | 0.12984 | 0.02793 | 0.21363 | 1                |                                          |      |                |          |          |         |                  |

Table S3. Atomic concentration of the samples after the 2<sup>nd</sup> heating.

|          | Atomic concentration |     |    |
|----------|----------------------|-----|----|
|          | Li                   | P   | Ta |
| Sample A | 1                    | 1.2 | 2  |
| Sample B | 1.1                  | 1.2 | 2  |
| Sample C | 1.2                  | 1.2 | 2  |
| Sample D | 1.2                  | 1.1 | 2  |

Table S4. Relative density of the sintered pellet samples.

| Sample              | A     | B     | C     | D    |
|---------------------|-------|-------|-------|------|
| Relative density /% | 95.48 | 88.21 | 94.38 | 90.6 |

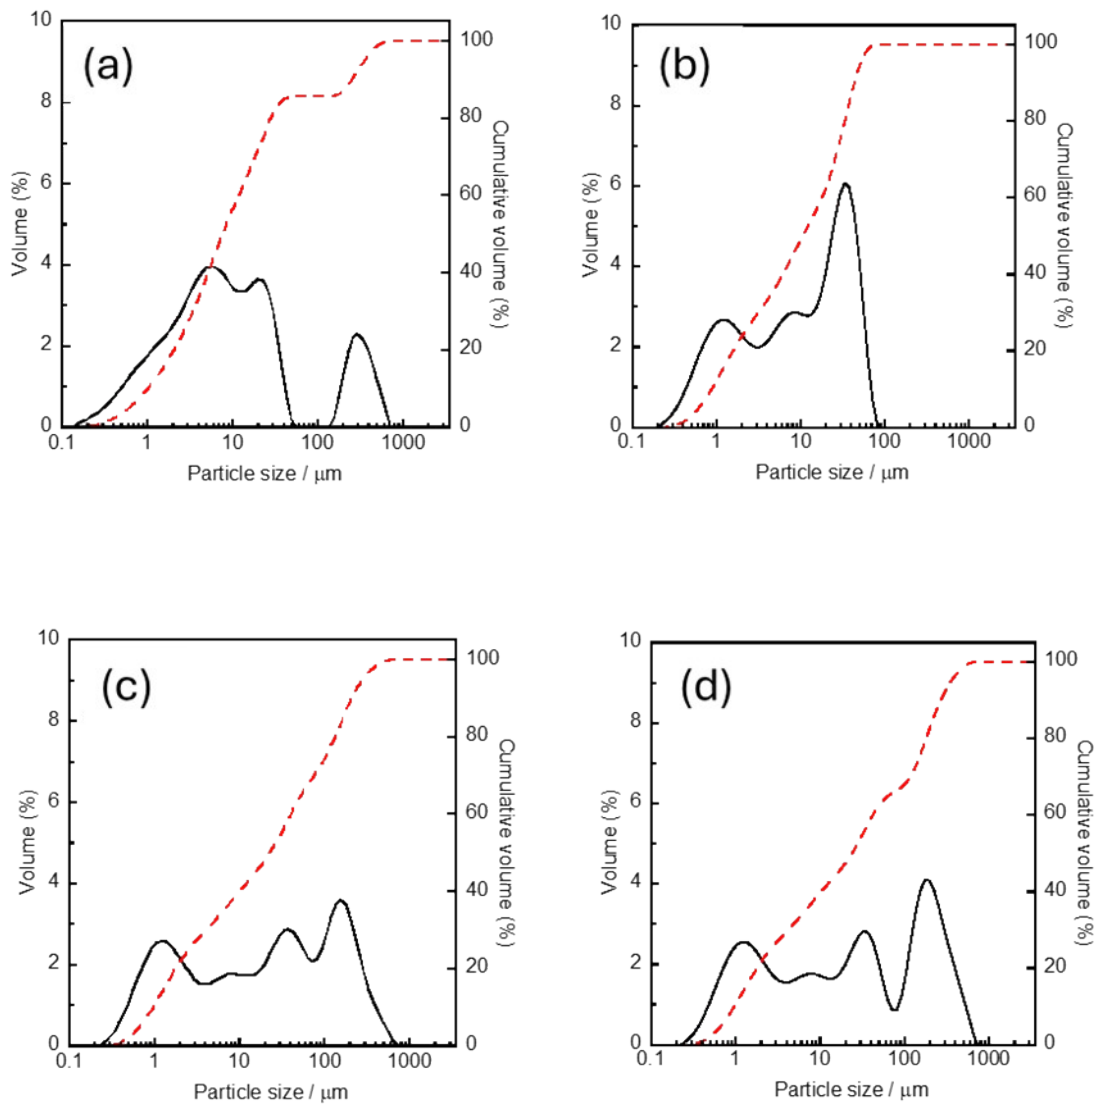

Fig. S1. Particle size distribution of the precursor particles for (a) sample A, (b) sample B, (c) sample C, and (d) sample D.

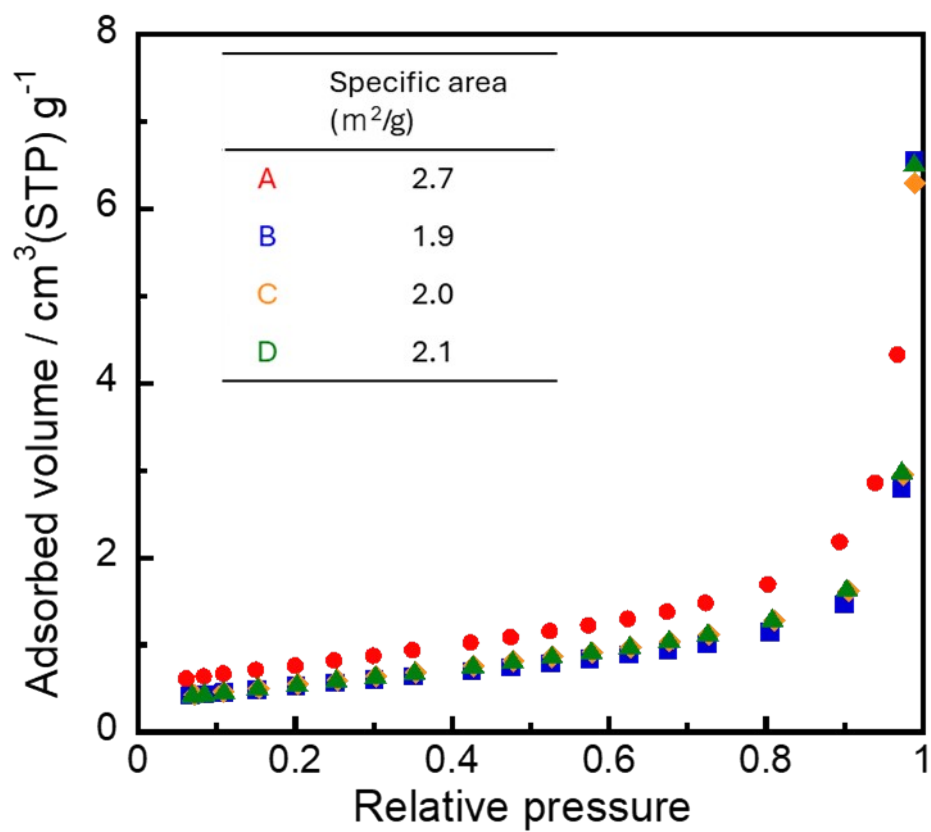

Fig. S2 Nitrogen gas adsorption curves of the adjusted samples A-D.

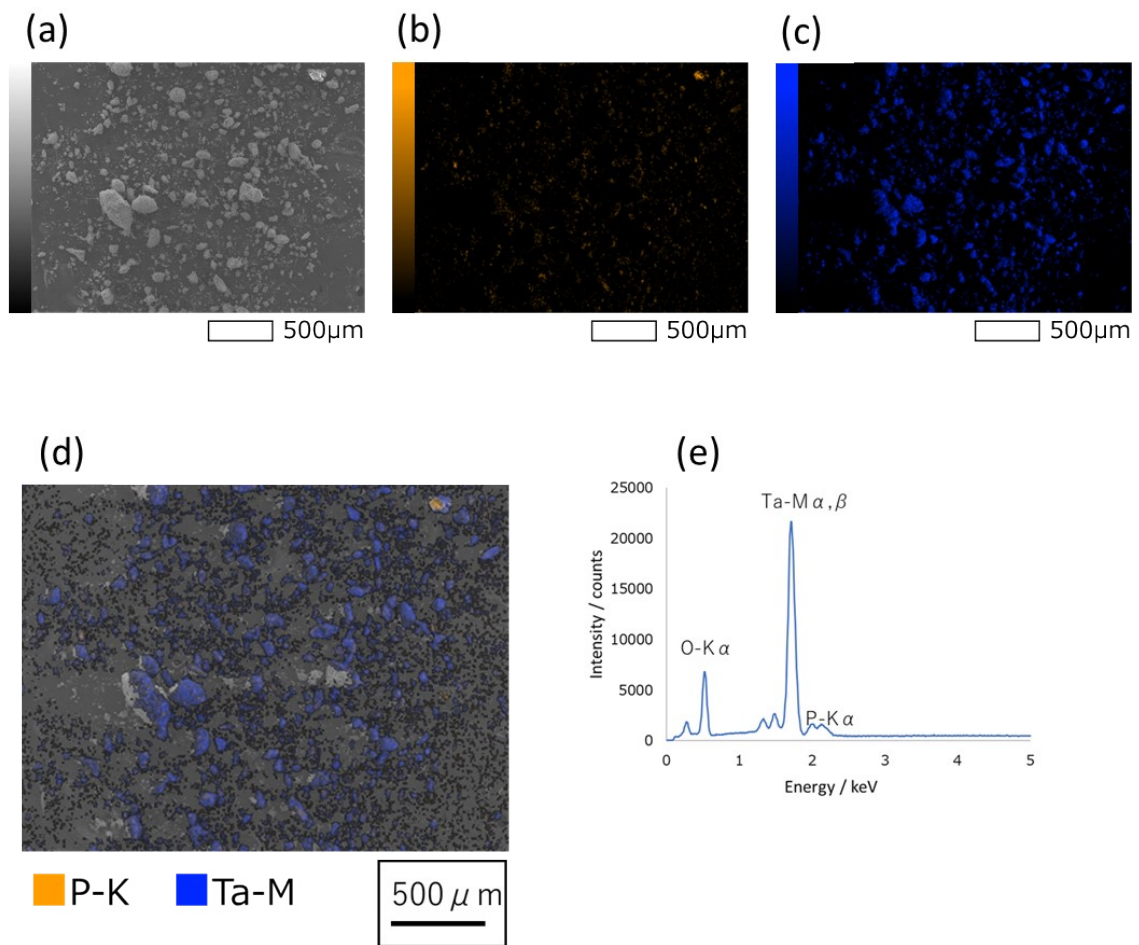

Fig. S3 SEM-EDS analysis results of the mixed starting powder materials for sample D. (a) SEM image, (b) P, (c) Ta, (d) P and Ta elemental distributions, and (e) EDS spectra.



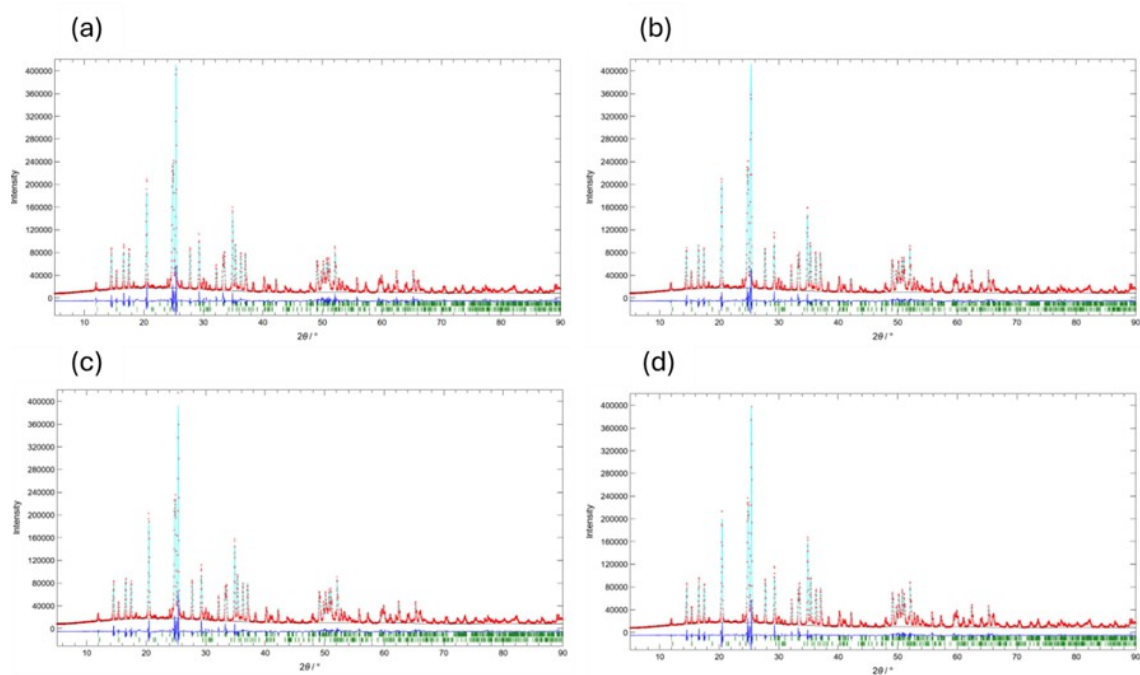

**Fig. S4** Rietveld refinement of the XRD patterns for the (a) sample A, (b) sample B, (c) sample C, and (d) sample D. Observed (red plus marks), calculated (light blue solid line), and differences between the observed and calculated patterns. The short vertical lines below the profile indicate the peak positions of all the possible Bragg reflections of LiTa<sub>2</sub>PO<sub>8</sub> and LiTa<sub>3</sub>O<sub>8</sub>.

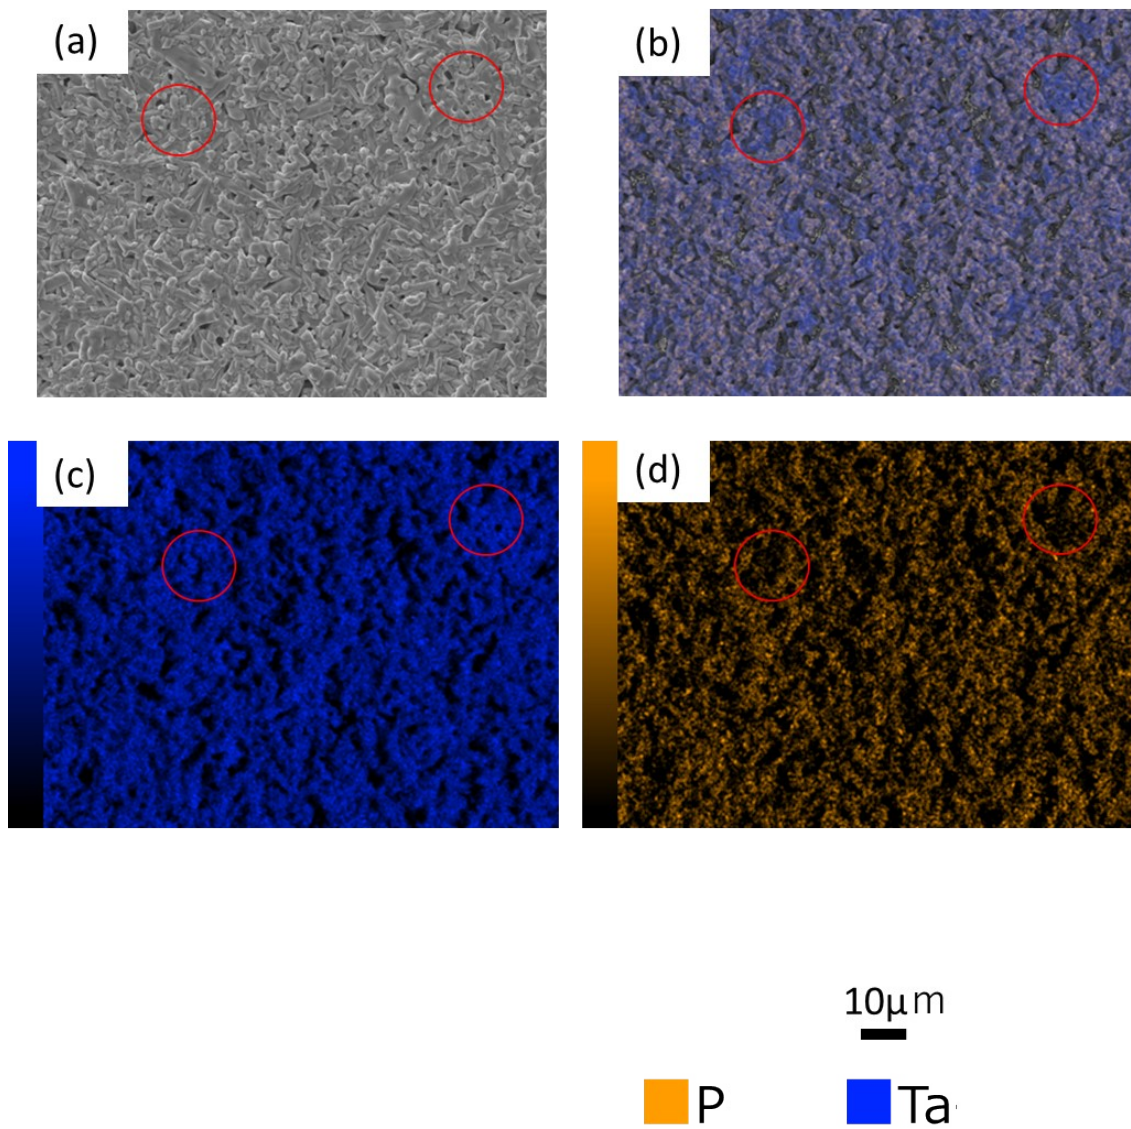

Fig. S5 (a) SEM image, (b) P and Ta, (c) P, and (d) Ta elemental distributions on the surface of the sintered sample B.

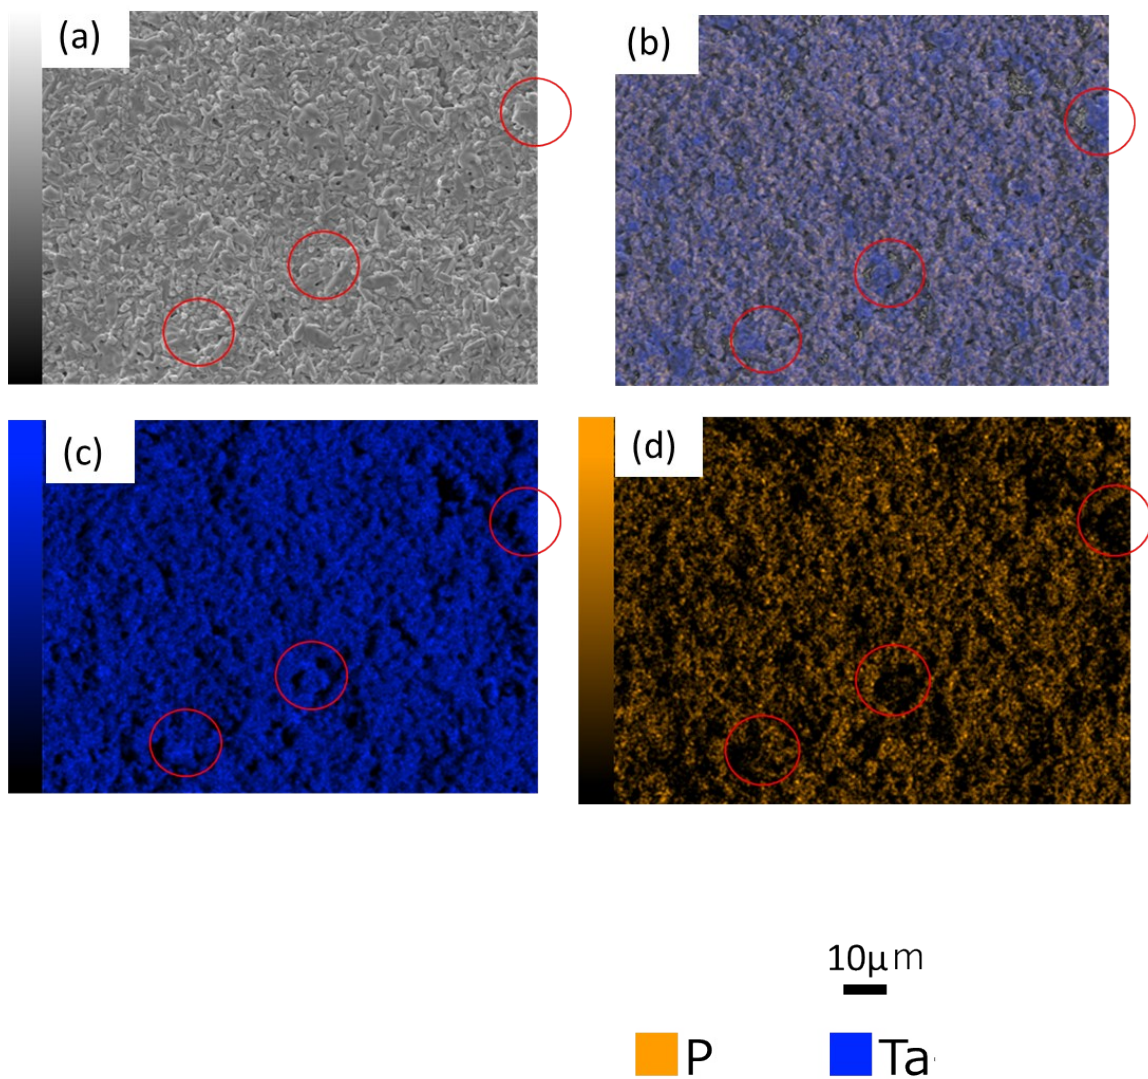

Fig. S6 (a) SEM image, (b) P and Ta, (c) P, and (d) Ta elemental distributions on the surface of the sintered sample C.

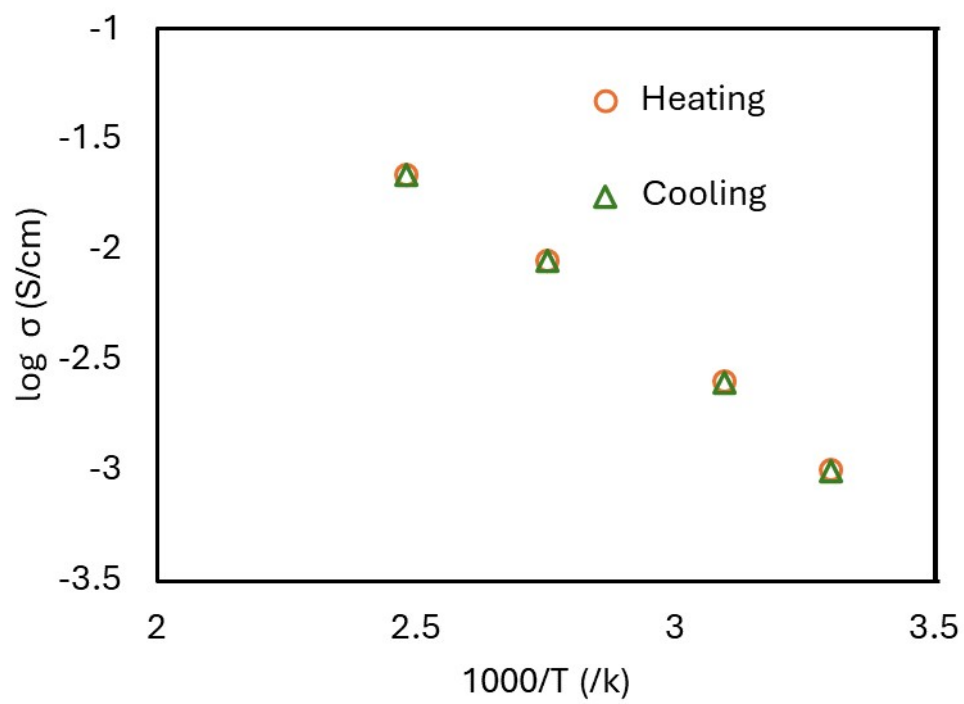

Fig.S7 □ The Arrhenius plots of the total ionic conductivity of the sample D before and after heating at 200 °C. Orange circles and green triangles corresponds to heating (before the heat treatment) and cooling (after the heat treatment) processes, respectively.

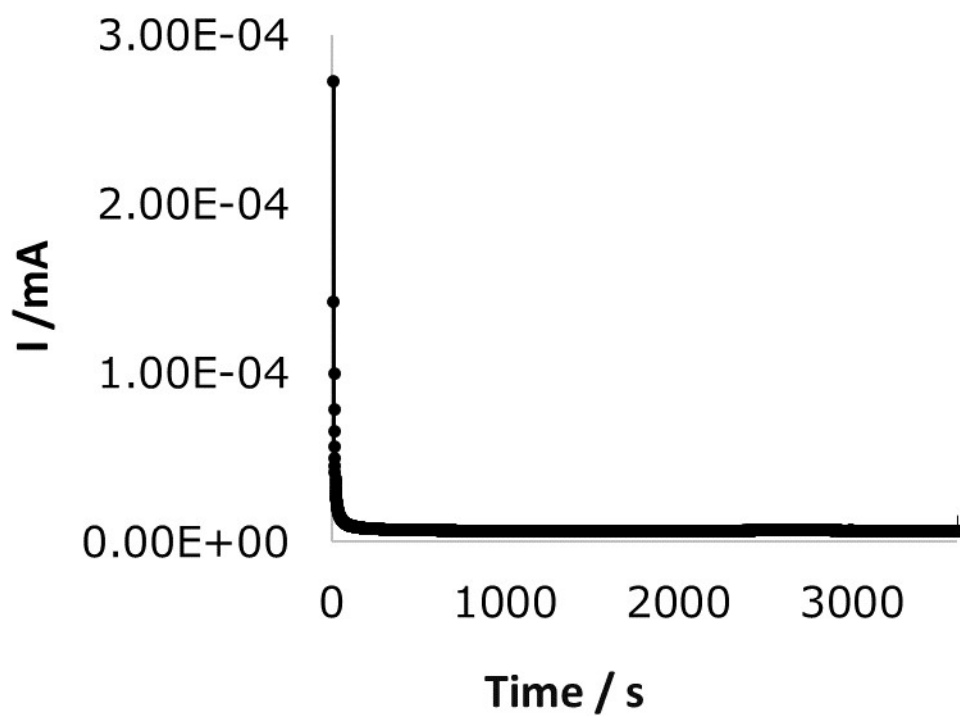

Fig. S8 □ Direct-current polarisation curves of the sintered sample D, measured at 30 °C with 100 mV voltage using blocking Au electrodes.
